# Supplementary material for: Optimal Tariffs with Endogenous Entry Mode: Uniform Versus Discriminatory Tariffs
Source: publisher site journal article supplement (doi:10.1515/bejeap-2025-0114), 2025-07-03
Supplement: Supplementary file 1 [file j_bejeap-2025-0114_suppl_001.docx]

**Online Appendices**

Online Appendix A: Optimal response conditions with exact parameter boundaries under a discriminatory tariff regime

| Scenario | Condition on | Condition on | Optimal response for firm 1 or firm 2 |
| --- | --- | --- | --- |
| Firm 2 chooses export |  |  | Firm 1 chooses export |
|  |  | Firm 1 chooses FDI |
|  |  |
| Firm 2 chooses FDI |  |  | Firm 1 chooses export |
|  |  |
|  |  | Firm 1 chooses FDI |
| Firm 1 chooses export |  |  | Firm 2 chooses export |
|  |  | Firm 2 chooses FDI |
|  |  |
| Firm 1 chooses FDI |  |  | Firm 2 chooses export |
|  |  | Firm 2 chooses FDI |
|  |  |

Online Appendix B: Nash equilibrium with exact parameter boundaries under a discriminatory tariff regime

| Case | Condition on | Condition on | Firm 1's Profit | Firm 2's Profit | Nash equilibrium |
| --- | --- | --- | --- | --- | --- |
| Case (i) |  |  |  |  | (Export, Export) |
| Case (ii) |  |  |  |  | (Export, FDI) |
|  |  |
|  |  |
| Case (iii) |  |  |  |  | (FDI, Export) |
| Case (iv) |  |  |  |  | (FDI, FDI) |

Online appendix C: Optimal response conditions with exact parameter boundaries under a uniform tariff regime

| Scenario | Condition on | Condition on | Optimal response for firm 1 or firm 2 |
| --- | --- | --- | --- |
| Firm 2 chooses export |  |  | Firm 1 chooses export |
|  |  | Firm 1 chooses FDI |
|  |  |
| Firm 2 chooses FDI |  |  | Firm 1 chooses export |
|  |  |
|  |  | Firm 1 chooses FDI |
| Firm 1 chooses export |  |  | Firm 2 chooses export |
|  |  | Firm 2 chooses FDI |
|  |  |
| Firm 1 chooses FDI |  |  | Firm 2 chooses export |
|  |  | Firm 2 chooses FDI |
|  |  |

Online Appendix D: Nash equilibrium with exact parameter boundaries under a uniform tariff regime

| Case | Condition on | Condition on | Firm 1's Profit | Firm 2's Profit | Nash equilibrium |
| --- | --- | --- | --- | --- | --- |
| Case (i) |  |  |  |  | (Export, Export) |
| Case (ii) |  |  |  |  | (Export, FDI) |
|  |  |
|  |  |
| Case (iii) |  |  |  |  | (FDI, Export) |
| Case (iv) |  |  |  |  | (FDI, FDI) |

Online Appendix E: Exact parameter boundaries under a uniform tariff regime with firms adopting the (Export, Export) entry mode

| Uniform tariff entry mode | Condition on | Condition on | Discriminatory tariff entry mode | Profit comparison |
| --- | --- | --- | --- | --- |
| (Export, Export) |  |  | (Export, Export) | and |
| (Export, Export) |  |  | (Export, FDI) | and |
| (Export, Export) |  |  |

Online Appendix F: Exact parameter boundaries under a uniform tariff regime with firms adopting the (Export, FDI) entry mode

| Uniform tariff entry mode | Condition on | Condition on | Discriminatory tariff entry mode | Profit comparison |
| --- | --- | --- | --- | --- |
| (Export, FDI) |  |  | (Export, FDI) | and |
| (Export, FDI) |  |  |
| (Export, FDI) |  |  |
| (Export, FDI) |  |  | (FDI, Export) | and |

Online Appendix G: Exact parameter boundaries under a uniform tariff regime with firms adopting the (FDI, Export) entry mode

| Uniform tariff entry mode | Condition on | Condition on | Discriminatory tariff entry mode | Profit comparison |
| --- | --- | --- | --- | --- |
| (FDI, Export) |  |  | (FDI, Export) | and |
| (FDI, Export) |  |  | (Export, FDI) | and |

Online Appendix H: Exact parameter boundaries under a uniform tariff regime with firms adopting the (FDI, FDI) entry mode

| Uniform tariff entry mode | Condition on | Condition on | Discriminatory tariff entry mode | Profit comparison |
| --- | --- | --- | --- | --- |
| (FDI, FDI) |  |  | (FDI, FDI) | and |

Online Appendix I: Equilibrium entry strategy for firms under a uniform tariff and the corresponding parameter ranges

| Entry mode | Condition on | Condition on | Condition on |
| --- | --- | --- | --- |
| (Export, Export) |  |  |  |
| (Export, FDI) |  |  |  |
|  |  |
|  |  |  |
| (FDI, Export) |  |  |  |
|  |  |  |
|  |  |
|  |  |  |
| (FDI, FDI) |  |  |  |
